# Supplementary material for: Neuronal loss of NCLX-dependent mitochondrial calcium efflux mediates age-associated cognitive decline
Source: PubMed Central journal article supplement — iScience. 2023 Feb 28;26(3):106296. doi: 10.1016/j.isci.2023.106296 (PMC10014305; doi:10.1016/j.isci.2023.106296), 2023-02-28
Supplement: mmc1.pdf [file mmc1.pdf]

iScience, Volume 26

## **Supplemental information**

### **Neuronal loss of NCLX-dependent mitochondrial calcium efflux mediates age-associated cognitive decline**

**Pooja Jadiya, Henry M. Cohen, Devin W. Kolmetzky, Ashlesha A. Kadam, Dhanendra Tomar, and John W. Elrod**

## Supplementary figures and legends

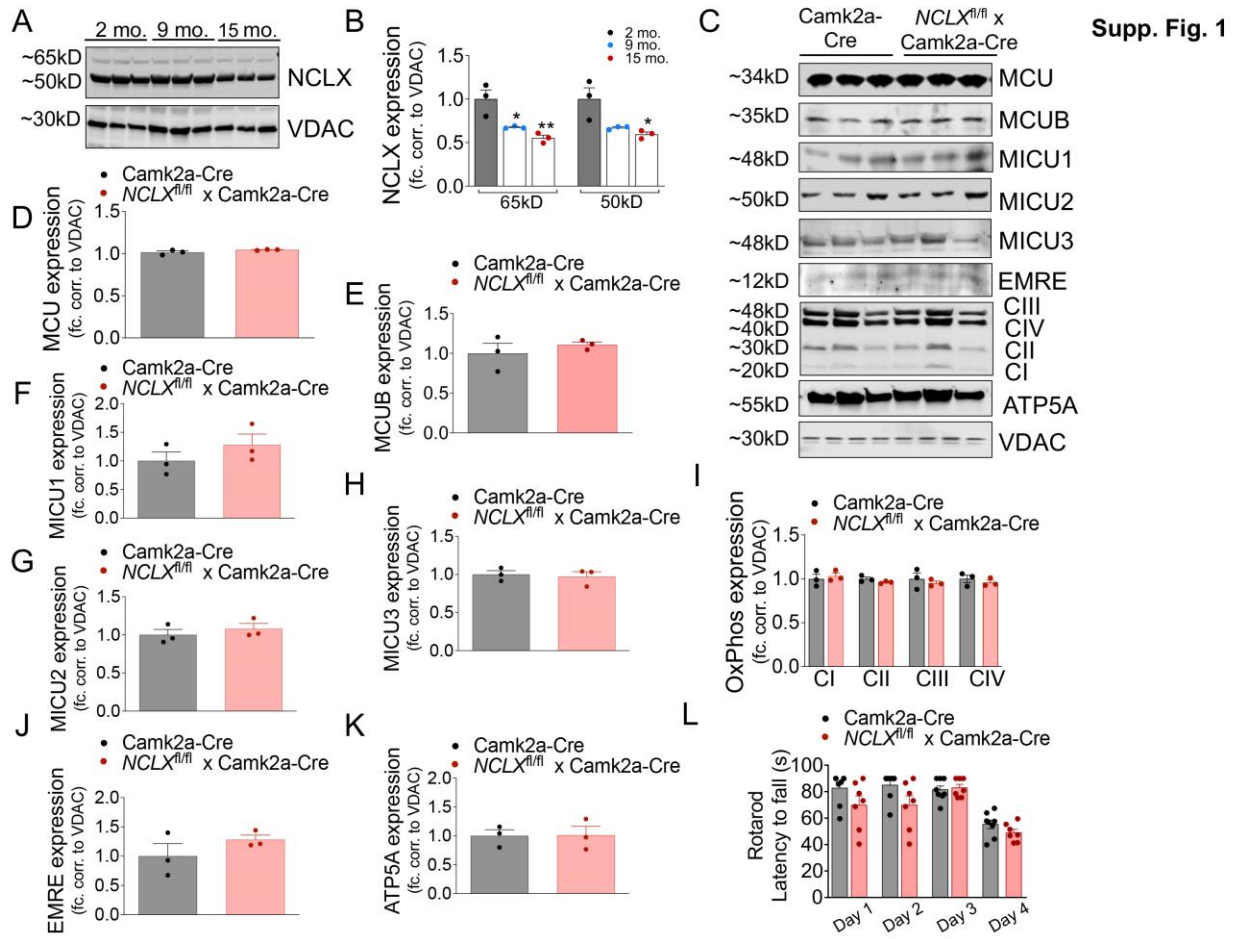

## Supplementary Figure 1, related to Figure 1. $mCa^{2+}$ exchanger expression and cognitive assay.

**A** Western blot for NCLX expression in tissue isolated from the cortex of 2-, 9-, and 15-month-old control (Camk2a-Cre) mice. **B** Quantification of NCLX protein expression expressed as fold change vs. 2-month-old Camk2a-Cre con. corrected to voltage-dependent anion channel (VDAC). **C** Western blot for proteins associated with  $mCa^{2+}$  exchange expression in tissue isolated from the cortex of 2-month-old  $NCLX^{fl/fl}$  x Camk2a-Cre mice compared to age-matched controls (Camk2a-Cre). **D-K** Densitometric analysis of western blots shown in Figure S1A expressed as fold change vs. Camk2a-Cre con. corrected to VDAC. **L** Rotarod test for locomotor performance, training phase (day 1 to 3), and test phase (day 4) in 15-month-old mice. n = 3-7. All data presented as mean  $\pm$  SEM; two-tailed, unpaired t-test.

Supp. Fig. 2

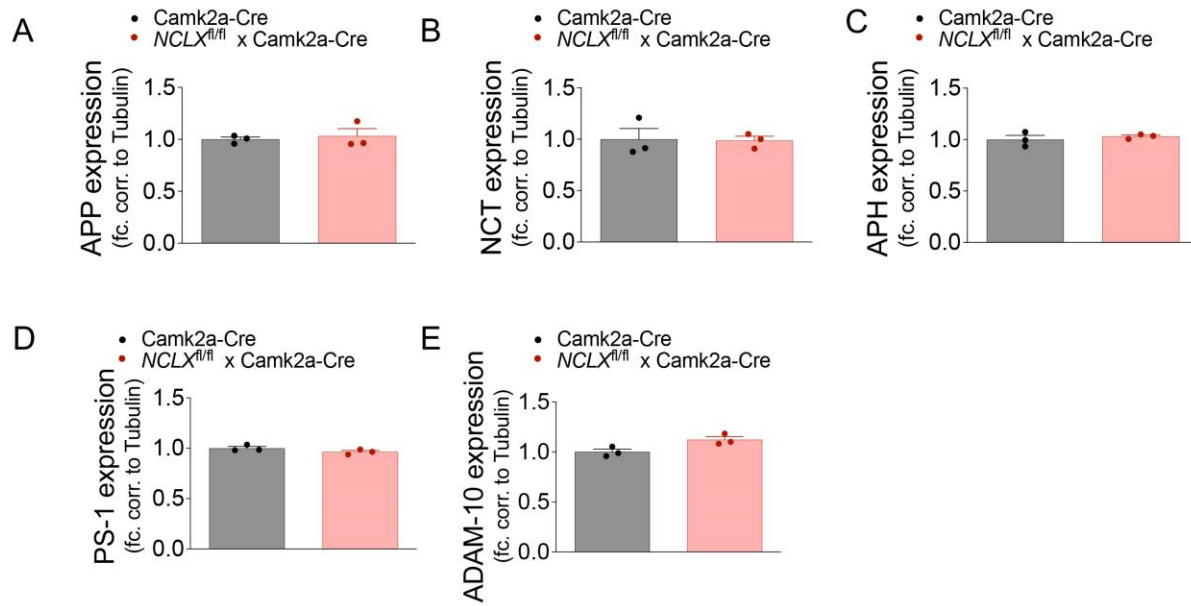

**Supplementary Figure 2, related to Figure 2. Effect of genetic ablation of neuronal  $mCa^{2+}$  efflux on the A $\beta$  pathway.**

**A-E** Densitometry analysis of Western blots shown in Figure 2C expressed as fold change vs. Camk2a-Cre con. corrected to a loading control tubulin. n = 3. All data presented as mean  $\pm$  SEM; two-tailed, unpaired t-test.

**Supp. Fig. 3**

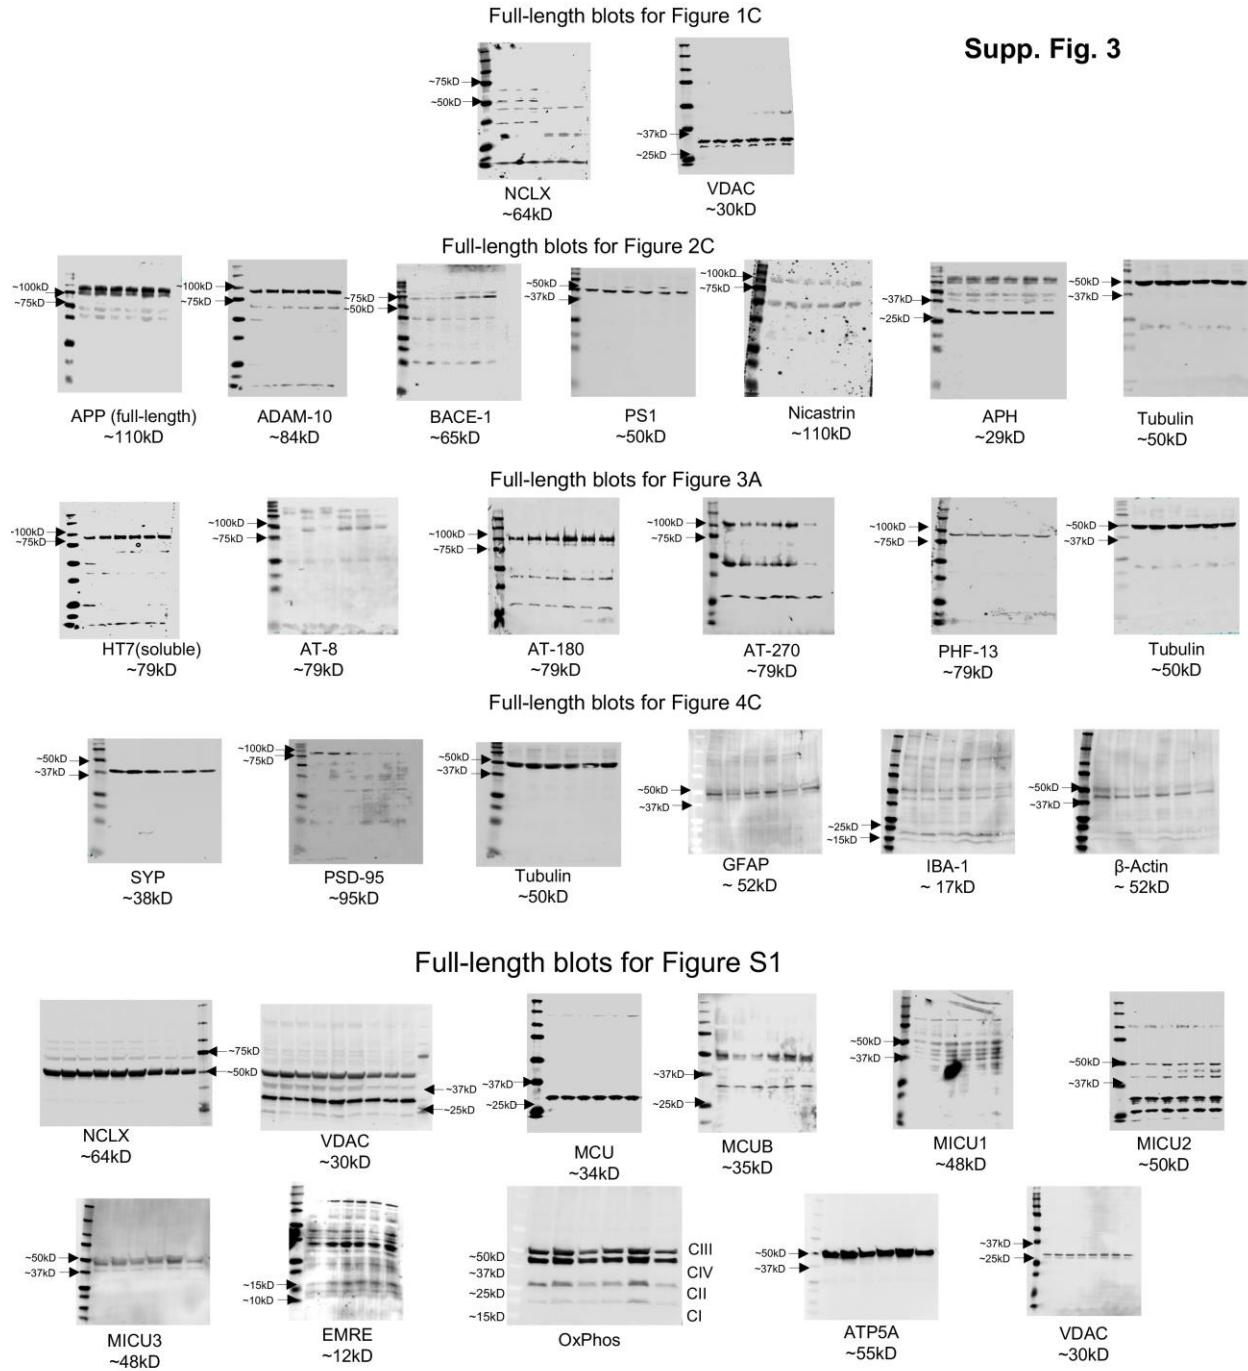

**Supplementary Figure 3, related to Figure 1, 2, 3 and 4. Full-length Western blots.**
